# Supplementary material for: Influenza coinfection inhibits control of mycobacterial infection in a human challenge model
Source: Research Square preprint supplement (doi:10.21203/rs.3.rs-6648705/v1), 2025-06-02
Supplement: Supplementary file 1 [file e204ea799329683db7890252.pdf]

## Extended Data

**Extended Data Figure 1. Schematic overview of whole blood samples used for transcriptomics analyses.** Each green and purple box represents a whole blood sample for RNA-sequencing, with each participant contributing 10 unique samples to the model.

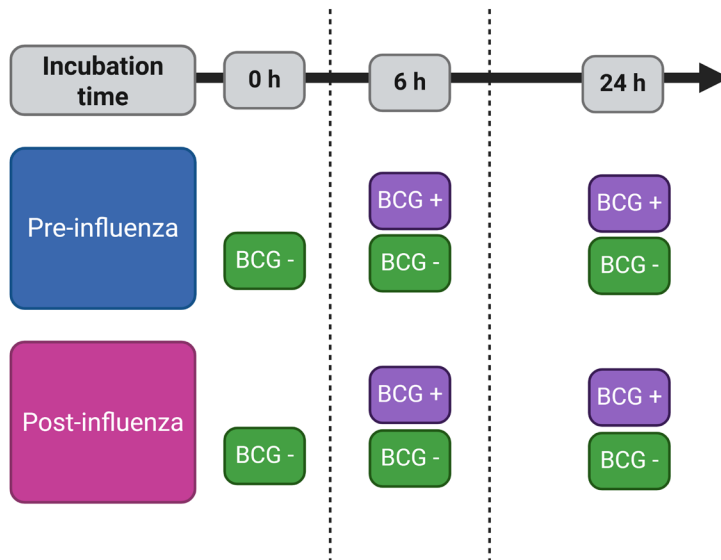

**Extended Data Figure 2. Genes significantly differentially expressed for the *Influenza: BCG* interaction and their associations with anti-mycobacterial immune responses.** For each gene, the log2 fold change (LFC) and Benjamini-Hochberg (BH) adjusted p value (adj. p) are listed for the variables: *BCG:Influenza interaction*, *BCG*, *Influenza* and *BCG+ BCG:Influenza*. *BCG+ BCG:Influenza* describes the effect of BCG when influenza is also present. Where adj. p≤0.05, the box is shaded blue.

| Ensembl gene ID | Gene symbol      | Gene name                                       | BCG: Influenza LFC | BCG: Influenza adj. p | BCG LFC | BCG adj. p | Influenza LFC | Influenza adj. p | BCG+ BCG: Influenza LFC | BCG+ BCG: Influenza adj. p | Associations with anti-mycobacterial immune responses in the literature                                                                                                                                                                                                                                                                                                                                                                                                                      |
|-----------------|------------------|-------------------------------------------------|--------------------|-----------------------|---------|------------|---------------|------------------|-------------------------|----------------------------|----------------------------------------------------------------------------------------------------------------------------------------------------------------------------------------------------------------------------------------------------------------------------------------------------------------------------------------------------------------------------------------------------------------------------------------------------------------------------------------------|
| ENSG00000137959 | <i>IFI44L</i>    | Interferon induced protein 44 like              | -1.67              | 2.07E-02              | 1.45    | 6.23E-04   | 3.57          | 4.37E-42         | -0.22                   | 6.40E-01                   | Interferon stimulated gene (ISG). Encodes anti-viral protein. Knockdown associated with increased intracellular survival of Mtb and reduced cell apoptosis <sup>1</sup> . Upregulated in tuberculosis (TB) disease <sup>2</sup> .                                                                                                                                                                                                                                                            |
| ENSG00000183844 | <i>FAM3B</i>     | FAM3 metabolism regulating signaling molecule B | -1.54              | 2.07E-02              | 0.05    | 8.99E-01   | 0.05          | 8.88E-01         | -1.49                   | 1.66E-04                   |                                                                                                                                                                                                                                                                                                                                                                                                                                                                                              |
| ENSG00000160932 | <i>LY6E</i>      | Lymphocyte antigen 6 family member E            | -1.42              | 1.05E-05              | 0.16    | 5.38E-01   | 2.43          | 2.93E-59         | -1.26                   | 1.86E-07                   | ISG. Modulates T cell receptor-mediated signalling, T cell activation and development <sup>3</sup> . Negatively modulates CD14 expression in monocytes and reduces their responsiveness to bacterial lipopolysaccharide (LPS) stimulation via downregulation of CD14/TLR4 pathways. Chronic <i>LY6E</i> upregulation, (e.g. in chronic HIV infection), may impair monocyte responses to bacterial pathogens and increase susceptibility to coinfections including <i>Mtb</i> <sup>4</sup> .  |
| ENSG00000111331 | <i>OAS3</i>      | 2'-5'-oligoadenylate synthetase 3               | -1.39              | 3.61E-03              | 1.82    | 1.32E-09   | 2.45          | 1.94E-38         | 0.44                    | 1.68E-01                   | Activates RNase L which cleaves cytoplasmic RNA and inhibits viral replication <sup>5</sup> . Upregulated in TB disease <sup>6-8</sup> . Suggested role in TB pathogenesis <sup>9</sup> . <i>OAS</i> expression in <i>Mtb</i> - and BCG- infected macrophages relates to pathogenicity: silencing of <i>OAS1-3</i> genes increases intracellular mycobacterial replication within macrophages and reduces IL-1β and TNF-α secretion <sup>10</sup> . Upregulated in TB disease <sup>2</sup> . |
| ENSG00000260943 | <i>LINC02555</i> | Long intergenic non-protein coding RNA 2555     | -1.38              | 2.44E-02              | 0.75    | 4.35E-02   | 0.93          | 2.31E-04         | -0.63                   | 9.46E-02                   |                                                                                                                                                                                                                                                                                                                                                                                                                                                                                              |
| ENSG00000246016 | <i>LINC01513</i> | Long intergenic non-protein coding RNA 1513     | -1.37              | 2.07E-02              | -2.96   | 6.19E-17   | 0.53          | 1.76E-02         | -4.33                   | 1.97E-31                   |                                                                                                                                                                                                                                                                                                                                                                                                                                                                                              |
| ENSG00000280270 |                  |                                                 | -1.35              | 3.61E-03              | 1.04    | 5.71E-04   | 2.19          | 4.02E-30         | -0.31                   | 3.05E-01                   |                                                                                                                                                                                                                                                                                                                                                                                                                                                                                              |

|                 |                  |                                                                  |       |          |       |          |       |          |       |          |                                                                                                                                                                                                                                                                                                                                                                                                                                                                                                                                                               |
|-----------------|------------------|------------------------------------------------------------------|-------|----------|-------|----------|-------|----------|-------|----------|---------------------------------------------------------------------------------------------------------------------------------------------------------------------------------------------------------------------------------------------------------------------------------------------------------------------------------------------------------------------------------------------------------------------------------------------------------------------------------------------------------------------------------------------------------------|
| ENSG00000134321 | <i>RSAD2</i>     | Radical S-adenosyl methionine domain containing 2                | -1.32 | 4.69E-02 | 1.48  | 5.71E-05 | 3.55  | 1.78E-54 | 0.17  | 6.82E-01 | ISG. Encodes an anti-viral protein commonly called viperin <sup>11</sup> . In vitro, viperin restricts growth of intracellular bacterial pathogens including <i>Listeria</i> and <i>Shigella</i> <sup>12</sup> . <i>Mtb</i> induces macrophage expression of RSAD2 <sup>13</sup> . Upregulated in TB disease <sup>2</sup> .                                                                                                                                                                                                                                   |
| ENSG00000174697 | <i>LEP</i>       | Leptin                                                           | -1.31 | 2.07E-02 | 4.22  | 2.62E-37 | 0.95  | 1.10E-04 | 2.92  | 2.40E-19 | Encodes regulatory hormone leptin. Induces activation of neutrophils, macrophages and DCs; increases production of pro-inflammatory cytokines (e.g. IL-1, TNF and IL-6); enhances cytotoxicity of NK cells; increases proliferation of naive T cells and B cells; can polarise T <sub>H</sub> cells towards a proinflammatory T <sub>H</sub> 1 subtype; reduces Treg cell proliferation and increases TH <sub>17</sub> cell responses <sup>14,15</sup> . In murine models, leptin deficiency is associated with reduced mycobacterial control <sup>16</sup> . |
| ENSG00000121236 | <i>TRIM6</i>     | tripartite motif containing 6                                    | -1.27 | 1.27E-02 | -0.86 | 7.35E-03 | 1.48  | 3.13E-17 | -2.14 | 3.69E-12 | The encoded protein is a member of the tripartite motif (TRIM) family, which are implicated in TB <sup>17</sup> . Role in T1-IFN signalling. TRIM6-deficiency associated with reduced T1-IFN induction and signalling in vitro <sup>18</sup> . Upregulated in TB disease <sup>2</sup> .                                                                                                                                                                                                                                                                       |
| ENSG00000107593 | <i>PKD2L1</i>    | Polycystin 2 like 1, transient receptor potential cation channel | -1.24 | 2.07E-02 | 0.31  | 3.78E-01 | 0.44  | 3.27E-02 | -0.93 | 7.98E-03 |                                                                                                                                                                                                                                                                                                                                                                                                                                                                                                                                                               |
| ENSG00000126709 | <i>IFI6</i>      | Interferon alpha inducible protein 6                             | -1.15 | 1.48E-02 | 0.98  | 5.32E-04 | 2.36  | 7.64E-42 | -0.17 | 5.73E-01 | ISG. Anti-viral protein. Regulator of type 1 IFN signalling <sup>19</sup> . Upregulated in TB disease <sup>2</sup> .                                                                                                                                                                                                                                                                                                                                                                                                                                          |
| ENSG00000137965 | <i>IFI44</i>     | Interferon induced protein 44                                    | -1.15 | 2.95E-02 | 0.90  | 3.99E-03 | 2.67  | 3.24E-44 | -0.25 | 4.45E-01 | ISG. Upregulated in TB disease <sup>2</sup> .                                                                                                                                                                                                                                                                                                                                                                                                                                                                                                                 |
| ENSG00000281162 | <i>LINC01127</i> | Long intergenic non-protein coding RNA 1127                      | -1.14 | 2.62E-02 | -0.77 | 1.23E-02 | -0.86 | 2.53E-05 | -1.91 | 2.39E-10 |                                                                                                                                                                                                                                                                                                                                                                                                                                                                                                                                                               |
| ENSG00000225964 | <i>NR1R</i>      | Negative regulator of interferon response                        | -1.08 | 3.31E-02 | 0.80  | 6.50E-03 | 2.47  | 2.15E-42 | -0.27 | 3.75E-01 | Long non-coding RNA, induced by IFN- $\alpha$ , negative regulator of IFN response. <sup>20</sup>                                                                                                                                                                                                                                                                                                                                                                                                                                                             |
| ENSG00000125968 | <i>ID1</i>       | Inhibitor of DNA binding 1,                                      | -1.07 | 2.32E-02 | -1.82 | 1.37E-10 | 0.44  | 3.04E-02 | -2.90 | 5.82E-24 | Transcription factor. May promote type 1 IFN signalling <sup>21</sup> . Upregulated in <i>Mtb</i> -infected macrophages <sup>22</sup> .                                                                                                                                                                                                                                                                                                                                                                                                                       |
| ENSG00000172426 | <i>RSPH9</i>     | Radial spoke head component 9                                    | -1.07 | 2.32E-02 | -0.80 | 5.01E-03 | 1.17  | 2.70E-11 | -1.88 | 1.03E-11 |                                                                                                                                                                                                                                                                                                                                                                                                                                                                                                                                                               |

|                 |                |                                                              |       |          |       |          |       |          |       |          |                                                                                                                                                                                                                                                                                                                                                                                                                                                                                                                                                                                      |
|-----------------|----------------|--------------------------------------------------------------|-------|----------|-------|----------|-------|----------|-------|----------|--------------------------------------------------------------------------------------------------------------------------------------------------------------------------------------------------------------------------------------------------------------------------------------------------------------------------------------------------------------------------------------------------------------------------------------------------------------------------------------------------------------------------------------------------------------------------------------|
| ENSG00000157601 | <i>MX1</i>     | MX dynamin like GTPase 1                                     | -1.07 | 2.29E-02 | 1.47  | 9.43E-08 | 1.98  | 2.45E-30 | 0.40  | 1.71E-01 | ISG. Encodes GTP-binding protein with antiviral activity. Blocks influenza virus transcription and replication <sup>23</sup> . Upregulated in TB disease <sup>2</sup> .                                                                                                                                                                                                                                                                                                                                                                                                              |
| ENSG00000233030 |                | novel transcript, antisense to <i>FCGR1A</i>                 | -1.05 | 1.07E-02 | 0.87  | 4.90E-04 | 1.05  | 8.28E-11 | -0.18 | 5.09E-01 |                                                                                                                                                                                                                                                                                                                                                                                                                                                                                                                                                                                      |
| ENSG00000133106 | <i>EPST11</i>  | Epithelial stromal interaction 1                             | -1.04 | 1.06E-03 | 0.92  | 1.20E-05 | 2.03  | 3.88E-54 | -0.12 | 6.03E-01 | ISG. Highly expressed in macrophages exposed to IFN- $\gamma$ and LPS. Possible modulatory role for macrophage activation and M1-M2 polarisation <sup>24</sup> . Upregulated in TB disease <sup>2</sup> .                                                                                                                                                                                                                                                                                                                                                                            |
| ENSG00000089127 | <i>OAS1</i>    | 2'-5'-oligoadenylate synthetase 1                            | -1.02 | 3.34E-02 | 0.94  | 6.33E-04 | 2.39  | 2.68E-44 | -0.07 | 8.14E-01 | Activates RNase L which cleaves cytoplasmic RNA and inhibits viral replication <sup>5</sup> . Upregulated in TB disease <sup>6-8</sup> . Suggested role in TB pathogenesis <sup>9</sup> . <i>OAS</i> expression in <i>Mtb</i> - and BCG- infected macrophages relates to pathogenicity: silencing of <i>OAS1</i> - 3 genes increases intracellular mycobacterial replication within macrophages and reduces IL-1 $\beta$ and TNF- $\alpha$ secretion <sup>10</sup> . <i>OAS1</i> polymorphisms have been associated with TB <sup>25</sup> . Upregulated in TB disease <sup>2</sup> . |
| ENSG00000138646 | <i>HERC5</i>   | HECT and RLD domain containing E3 ubiquitin protein ligase 5 | -1.00 | 2.51E-02 | 0.92  | 5.11E-04 | 1.74  | 7.54E-26 | -0.08 | 7.83E-01 | ISG. Encodes an enzyme that promotes conjugation of ISG15 to its targets (ISGylation), promoting IFN- $\gamma$ release from NK cells and T cells <sup>26</sup> . Loss-of-function mutations of ISG15 in humans and mice are associated with increased susceptibility to mycobacteria <sup>27,28</sup> . Upregulated in TB disease <sup>2</sup> .                                                                                                                                                                                                                                     |
| ENSG00000257878 |                | Novel transcript, antisense to <i>LTA4H</i>                  | -1.00 | 2.51E-02 | -0.64 | 1.48E-02 | -0.18 | 4.04E-01 | -1.64 | 2.48E-10 |                                                                                                                                                                                                                                                                                                                                                                                                                                                                                                                                                                                      |
| ENSG00000278330 |                | Novel transcript, antisense to <i>MBP</i>                    | -0.98 | 2.44E-02 | 2.77  | 1.42E-28 | 0.18  | 4.23E-01 | 1.79  | 1.18E-12 |                                                                                                                                                                                                                                                                                                                                                                                                                                                                                                                                                                                      |
| ENSG00000111335 | <i>OAS2</i>    | 2'-5'-oligoadenylate synthetase 2                            | -0.97 | 9.94E-03 | 1.17  | 2.56E-07 | 1.76  | 8.58E-35 | 0.20  | 4.07E-01 | Activates RNase L which cleaves cytoplasmic RNA and inhibits viral replication <sup>5</sup> . Upregulated in TB disease <sup>6-8</sup> . Suggested role in TB pathogenesis <sup>9</sup> . <i>OAS</i> expression in <i>Mtb</i> - and BCG- infected macrophages relates to pathogenicity: silencing of <i>OAS1</i> - 3 genes increases intracellular mycobacterial replication within macrophages and reduces IL-1 $\beta$ and TNF- $\alpha$ secretion <sup>10</sup> . Upregulated in TB disease <sup>2</sup> .                                                                        |
| ENSG00000196141 | <i>SPATS2L</i> | Spermatogenesis associated serine rich 2 like                | -0.91 | 1.64E-02 | 0.79  | 5.08E-04 | 1.69  | 1.56E-33 | -0.12 | 6.18E-01 | Upregulated in TB disease <sup>2</sup> .                                                                                                                                                                                                                                                                                                                                                                                                                                                                                                                                             |
| ENSG00000270972 |                |                                                              | -0.89 | 3.83E-02 | -0.10 | 7.26E-01 | 1.06  | 1.85E-11 | -0.99 | 4.55E-05 |                                                                                                                                                                                                                                                                                                                                                                                                                                                                                                                                                                                      |

|                 |               |                                                  |       |          |       |          |       |          |       |          |                                                                                                                                                                                                                                                                                                                                                                                |
|-----------------|---------------|--------------------------------------------------|-------|----------|-------|----------|-------|----------|-------|----------|--------------------------------------------------------------------------------------------------------------------------------------------------------------------------------------------------------------------------------------------------------------------------------------------------------------------------------------------------------------------------------|
| ENSG00000188313 | <i>PLSCR1</i> | Phospholipid scramblase 1                        | -0.86 | 4.17E-03 | 1.32  | 2.49E-12 | 1.35  | 1.22E-29 | 0.46  | 1.70E-02 | ISG. Antiviral protein. <sup>29</sup> Possible immunomodulatory roles <sup>30</sup> . Upregulated in TB disease <sup>2</sup> .                                                                                                                                                                                                                                                 |
| ENSG00000173801 | <i>JUP</i>    | Junction plakoglobin                             | -0.80 | 9.94E-03 | -0.52 | 6.48E-03 | 1.02  | 1.54E-17 | -1.33 | 1.22E-12 |                                                                                                                                                                                                                                                                                                                                                                                |
| ENSG00000124762 | <i>CDKN1A</i> | Cyclin dependent kinase inhibitor 1A             | -0.80 | 2.26E-02 | 1.99  | 9.39E-23 | 0.69  | 6.14E-07 | 1.19  | 6.33E-09 | Encodes the cyclin-dependent kinase inhibitor p21 which has immunomodulatory roles including T cell proliferation <sup>31</sup> , macrophage activation <sup>32</sup> and inflammation <sup>33</sup>                                                                                                                                                                           |
| ENSG00000136514 | <i>RTP4</i>   | Receptor transporter protein 4                   | -0.78 | 2.62E-02 | 1.07  | 1.46E-07 | 1.69  | 1.42E-39 | 0.30  | 1.63E-01 | ISG. Anti-viral factor. Regulates type 1 IFN responses <sup>34,35</sup> .                                                                                                                                                                                                                                                                                                      |
| ENSG00000170458 | <i>CD14</i>   | CD14                                             | -0.76 | 2.07E-02 | 0.34  | 8.84E-02 | 0.30  | 4.18E-02 | -0.42 | 3.54E-02 | Expressed on the surface of monocytes and some polymorphonuclear cells. Co-receptor for several TLRs; facilitates activation of the innate immune response by bacterial LPS; functions as a pattern recognition receptor (PRR) <sup>36</sup> . Increased CD14+ cells observed in the blood of patients with TB disease and show upregulated expression of ISGs <sup>37</sup> . |
| ENSG00000137628 | <i>DDX60</i>  | DExD/H-box helicase 60                           | -0.75 | 3.71E-02 | 1.07  | 1.40E-07 | 1.51  | 3.18E-32 | 0.32  | 1.31E-01 | ISG. Role in type 1 IFN signalling <sup>38</sup> . Upregulated in TB disease <sup>2</sup> .                                                                                                                                                                                                                                                                                    |
| ENSG00000130489 |               |                                                  | -0.73 | 3.61E-03 | -0.30 | 6.60E-02 | 1.04  | 7.54E-26 | -1.03 | 4.13E-11 |                                                                                                                                                                                                                                                                                                                                                                                |
| ENSG00000258922 |               |                                                  | -0.69 | 3.83E-02 | 1.49  | 6.73E-16 | -0.01 | 9.62E-01 | 0.80  | 2.17E-05 |                                                                                                                                                                                                                                                                                                                                                                                |
| ENSG00000161929 | <i>SCIMP</i>  | SLP adaptor and CSK interacting membrane protein | -0.68 | 3.71E-02 | -1.36 | 9.85E-14 | 0.39  | 2.71E-03 | -2.04 | 3.70E-29 | Universal adaptor for multiple Toll like receptors, promoting macrophage production of proinflammatory cytokines <sup>39,40</sup> .                                                                                                                                                                                                                                            |
| ENSG00000068079 | <i>IFI35</i>  | Interferon induced protein 35                    | -0.66 | 4.24E-02 | 0.40  | 3.46E-02 | 1.15  | 1.69E-23 | -0.26 | 1.70E-01 | Modulates type 1 IFN activity in influenza infection <sup>41</sup> . Role in bacterial sepsis as a damage associated molecular pattern (DAMP) molecule, activating the NF-κB proinflammatory signalling pathway of adjacent macrophages <sup>42</sup> . Upregulated in TB disease <sup>2</sup> .                                                                               |

|                 |                 |                                              |       |          |       |          |       |          |       |          |                                                                                                                                                                                                                                                                                                                                                                                                                                                                                                                                                                                                                                                                                                                                  |
|-----------------|-----------------|----------------------------------------------|-------|----------|-------|----------|-------|----------|-------|----------|----------------------------------------------------------------------------------------------------------------------------------------------------------------------------------------------------------------------------------------------------------------------------------------------------------------------------------------------------------------------------------------------------------------------------------------------------------------------------------------------------------------------------------------------------------------------------------------------------------------------------------------------------------------------------------------------------------------------------------|
| ENSG00000185507 | <i>IRF7</i>     | Interferon regulatory factor 7               | -0.65 | 4.43E-02 | 0.95  | 1.10E-07 | 1.25  | 1.16E-28 | 0.30  | 1.03E-01 | Key transcriptional regulator of type 1 IFN responses. Following activation of PRRs (including TLR3, 7, 8 and 9) by viral RNA/ DNA, IRF7 as well as IRF3 induce expression of IFN- $\alpha/\beta$ which further increase IRF7 expression in a positive feedback loop <sup>43,44</sup> . IRF7-deficient humans and mice are vulnerable to severe viral infections <sup>43,45,46</sup> . In vitro, IRF7 expression is upregulated in <i>Mtb</i> -infected macrophages <sup>47-49</sup> . IRF7-/- knock out mice have higher <i>Mtb</i> bacillary burdens and lower survival rates <sup>50</sup> . IRF7 polymorphisms are linked to altered susceptibility to TB infection <sup>51</sup> . Upregulated in TB disease <sup>2</sup> . |
| ENSG00000141664 | <i>ZCCHC2</i>   | Zinc finger CCHC-type containing 2           | -0.64 | 6.98E-04 | 0.28  | 2.91E-02 | 0.90  | 2.08E-30 | -0.36 | 4.90E-03 | Association with type 4 hypersensitivity reactions <sup>52</sup> .                                                                                                                                                                                                                                                                                                                                                                                                                                                                                                                                                                                                                                                               |
| ENSG00000151490 | <i>PTPRO</i>    | Protein tyrosine phosphatase receptor type O | -0.64 | 3.61E-03 | -0.16 | 2.84E-01 | 0.55  | 7.74E-10 | -0.79 | 5.83E-09 | Immunoregulatory role in T cells, B cells, macrophages including TLR4/NFKB signalling <sup>53</sup> .                                                                                                                                                                                                                                                                                                                                                                                                                                                                                                                                                                                                                            |
| ENSG00000116663 | <i>FBXO6</i>    | F-box protein 6                              | -0.62 | 2.60E-02 | 0.33  | 5.23E-02 | 0.94  | 1.60E-19 | -0.29 | 8.37E-02 | Activated by influenza A infection. Regulates type 1 IFN signalling via IRF3 <sup>54</sup> . Upregulated in TB disease <sup>2</sup> .                                                                                                                                                                                                                                                                                                                                                                                                                                                                                                                                                                                            |
| ENSG00000012171 | <i>SEMA3B</i>   | Semaphorin 3B                                | -0.59 | 2.14E-02 | -0.66 | 1.17E-05 | 0.18  | 1.19E-01 | -1.25 | 6.69E-17 | Immunomodulatory effects in macrophages of rheumatoid arthritis patients <sup>55</sup> .                                                                                                                                                                                                                                                                                                                                                                                                                                                                                                                                                                                                                                         |
| ENSG00000025708 | <i>TYMP</i>     | Thymidine phosphorylase                      | -0.59 | 5.34E-03 | -0.22 | 1.08E-01 | 0.71  | 7.52E-17 | -0.81 | 9.28E-10 | Upregulated in TB disease <sup>2</sup> .                                                                                                                                                                                                                                                                                                                                                                                                                                                                                                                                                                                                                                                                                         |
| ENSG00000279236 |                 |                                              | -0.57 | 1.73E-02 | -0.05 | 7.49E-01 | 0.76  | 2.45E-17 | -0.62 | 1.04E-05 |                                                                                                                                                                                                                                                                                                                                                                                                                                                                                                                                                                                                                                                                                                                                  |
| ENSG00000197629 | <i>MPEG1</i>    | Macrophage expressed 1                       | -0.56 | 4.84E-02 | -0.34 | 3.21E-02 | -0.11 | 4.19E-01 | -0.90 | 7.15E-09 | Also known as Perforin-2. Pore-forming protein <sup>56</sup> . Knock out studies suggest role in control of intracellular bacterial and mycobacterial infections <sup>57</sup> .                                                                                                                                                                                                                                                                                                                                                                                                                                                                                                                                                 |
| ENSG00000130487 | <i>KLHDC7B</i>  | Kelch domain containing 7B                   | -0.54 | 3.83E-02 | 0.26  | 9.81E-02 | 1.03  | 1.44E-27 | -0.29 | 6.30E-02 | Expression associated with STAT1-mediated IFN signalling pathway <sup>58</sup> .                                                                                                                                                                                                                                                                                                                                                                                                                                                                                                                                                                                                                                                 |
| ENSG00000130303 | <i>BST2</i>     | Bone marrow stromal cell antigen 2           | -0.54 | 2.07E-02 | 0.13  | 3.77E-01 | 0.95  | 3.42E-28 | -0.41 | 3.17E-03 | Protein also known as tetherin is an IFN-inducible transmembrane protein with anti-viral activities, including restricting virion release <sup>59</sup> . Induces activation of the NF- $\kappa$ B signalling pathway, promoting pro-inflammatory responses to pathogens including <i>Mtb</i> <sup>60,61</sup> .                                                                                                                                                                                                                                                                                                                                                                                                                 |
| ENSG00000165185 | <i>KIAA1958</i> | KIAA1958                                     | -0.43 | 2.67E-02 | -0.20 | 9.75E-02 | 0.46  | 9.15E-10 | -0.63 | 3.69E-08 |                                                                                                                                                                                                                                                                                                                                                                                                                                                                                                                                                                                                                                                                                                                                  |
| ENSG00000113273 | <i>ARSB</i>     | Arylsulfatase B                              | -0.43 | 1.52E-02 | 0.64  | 8.39E-10 | 0.24  | 1.10E-03 | 0.21  | 5.14E-02 |                                                                                                                                                                                                                                                                                                                                                                                                                                                                                                                                                                                                                                                                                                                                  |
| ENSG00000124357 | <i>NAGK</i>     | N-acetylglucosamine kinase                   | -0.43 | 3.83E-02 | 0.52  | 7.74E-06 | 0.31  | 1.18E-04 | 0.09  | 4.54E-01 | Upstream of NOD2, modifies bacterial cell wall peptidoglycan, enabling recognition by PRRs, triggering pro-inflammatory gene expression. <sup>62</sup>                                                                                                                                                                                                                                                                                                                                                                                                                                                                                                                                                                           |

|                 |                  |                                                                |       |          |       |          |       |          |       |          |                                                                                                                                                                                                                                                                                                                                                                                                                                                      |
|-----------------|------------------|----------------------------------------------------------------|-------|----------|-------|----------|-------|----------|-------|----------|------------------------------------------------------------------------------------------------------------------------------------------------------------------------------------------------------------------------------------------------------------------------------------------------------------------------------------------------------------------------------------------------------------------------------------------------------|
| ENSG00000172936 | <i>MYD88</i>     | MYD88 innate immune signal transduction adaptor                | -0.43 | 1.16E-02 | 0.31  | 2.68E-03 | 0.39  | 6.44E-09 | -0.12 | 2.80E-01 | Encodes downstream adaptor protein for most TLRs and the IL-1 receptor (IL-1R). After pathogen-sensing, the activated TLR activates MyD88, which in turn activates NF- $\kappa$ B, which mediates the induction of pro-inflammatory cytokines, and IRFs. MyD88-deficient children are vulnerable to severe pyogenic bacterial infections <sup>63</sup> . Mice with MyD88-deficiency are vulnerable to pathogens including <i>Mtb</i> <sup>64</sup> . |
| ENSG00000163565 | <i>IFI16</i>     | Interferon gamma inducible protein 16                          | -0.40 | 2.29E-02 | 0.45  | 1.45E-05 | 0.59  | 1.51E-19 | 0.05  | 6.75E-01 | Senses cytosolic viral RNA <sup>65</sup> and exogenous DNA <sup>66</sup> triggering type 1 IFN production. Role as <i>Mtb</i> DNA sensor in macrophages, increasing IFIT1 and IFN- $\beta$ induction <sup>13</sup> .                                                                                                                                                                                                                                 |
| ENSG00000173786 | <i>CNP</i>       | 2',3'-cyclic nucleotide 3' phosphodiesterase                   | -0.40 | 1.74E-02 | 0.61  | 6.09E-10 | 0.64  | 1.37E-24 | 0.21  | 3.84E-02 |                                                                                                                                                                                                                                                                                                                                                                                                                                                      |
| ENSG00000180530 | <i>NRIP1</i>     | Nuclear receptor interacting protein 1                         | -0.36 | 1.52E-02 | -0.10 | 2.72E-01 | 0.24  | 9.21E-05 | -0.47 | 1.50E-07 | Encodes Receptor-interacting protein 140. Coactivator for NF $\kappa$ B inflammation pathways. Deficiency leads to the inhibition of the proinflammatory gene expression in macrophages <sup>67</sup>                                                                                                                                                                                                                                                |
| ENSG00000100220 | <i>RTCB</i>      | RNA 2',3'-cyclic phosphate and 5'-OH ligase                    | -0.29 | 5.34E-03 | 0.07  | 3.11E-01 | 0.42  | 2.65E-24 | -0.22 | 9.83E-04 | RTCB-depletion leads to increased type I and type III IFNs and proinflammatory cytokine responses in influenza infection. RTCB suppresses the expression of IFN and downstream ISGs <sup>68</sup> .                                                                                                                                                                                                                                                  |
| ENSG00000106617 | <i>PRKAG2</i>    | Protein kinase AMP-activated non-catalytic subunit gamma 2     | -0.27 | 2.44E-02 | -0.17 | 2.02E-02 | 0.15  | 3.89E-03 | -0.44 | 4.57E-10 | In FoxA1+ regulatory T cells, the variant PRKAG2.2 is transcribed in response to IFN- $\beta$ , with roles in FoxA1+ Treg differentiation and metabolic function <sup>69</sup> .                                                                                                                                                                                                                                                                     |
| ENSG00000231721 | <i>LINC-PINT</i> | Long intergenic non-protein coding RNA, p53 induced transcript | 0.21  | 3.65E-02 | -0.20 | 5.22E-04 | -0.16 | 4.21E-05 | 0.01  | 8.70E-01 |                                                                                                                                                                                                                                                                                                                                                                                                                                                      |
| ENSG00000104450 | <i>SPAG1</i>     | Sperm associated antigen 1                                     | 0.30  | 3.83E-02 | -0.13 | 1.26E-01 | -0.12 | 6.34E-02 | 0.17  | 4.13E-02 |                                                                                                                                                                                                                                                                                                                                                                                                                                                      |
| ENSG00000226380 |                  |                                                                | 0.36  | 2.07E-02 | 0.49  | 4.24E-08 | -0.18 | 5.52E-03 | 0.84  | 1.31E-21 |                                                                                                                                                                                                                                                                                                                                                                                                                                                      |
| ENSG00000134602 | <i>STK26</i>     | Serine/threonine kinase 26                                     | 0.36  | 4.17E-03 | 0.26  | 1.35E-03 | -0.06 | 3.48E-01 | 0.63  | 4.76E-15 | Also known as MST4. Regulatory role in inflammation, downregulated in sepsis <sup>70</sup> .                                                                                                                                                                                                                                                                                                                                                         |
| ENSG00000183150 | <i>GPR19</i>     | G protein-coupled receptor 19                                  | 0.42  | 2.44E-02 | 0.31  | 6.27E-03 | -0.22 | 7.09E-03 | 0.72  | 5.30E-11 |                                                                                                                                                                                                                                                                                                                                                                                                                                                      |
| ENSG00000109756 | <i>RAPGEF2</i>   | Rap guanine nucleotide                                         | 0.43  | 9.94E-03 | 0.60  | 1.55E-09 | -0.20 | 7.55E-03 | 1.03  | 2.03E-25 |                                                                                                                                                                                                                                                                                                                                                                                                                                                      |

|                 |              |                               |      |          |       |          |       |          |       |          |                                                                                                                                       |
|-----------------|--------------|-------------------------------|------|----------|-------|----------|-------|----------|-------|----------|---------------------------------------------------------------------------------------------------------------------------------------|
|                 |              | exchange factor<br>2          |      |          |       |          |       |          |       |          |                                                                                                                                       |
| ENSG00000197965 | <i>MPZL1</i> | Myelin protein<br>zero like 1 | 0.66 | 3.83E-02 | -2.04 | 2.30E-30 | -0.74 | 4.51E-10 | -1.38 | 1.62E-14 | Downregulated in murine bone marrow-derived macrophages<br>infected with hypervirulent versus hypovirulent <i>Mtb</i> <sup>49</sup> . |



**Extended Data Figure 3. Nine gene clusters identified by maSigPro.** In total, 2,140 genes were identified as significantly differentially expressed (SDE) over time and between pre- *versus* post-influenza (adj.  $p \leq 0.05$ ,  $R^2 > 0.6$ ). The coefficients obtained were used to group together SDE genes into clusters with similar temporal expression patterns. Summary plots of gene expression over time for the BCG-infected pre-influenza (dark blue), BCG-infected post-influenza (pink), BCG-uninfected pre-influenza (light blue) and BCG-uninfected post-influenza (red) groups are shown. Solid lines connect the median expression to show the trends for each group, and the dashed lines show the regression curves fitted to the data.

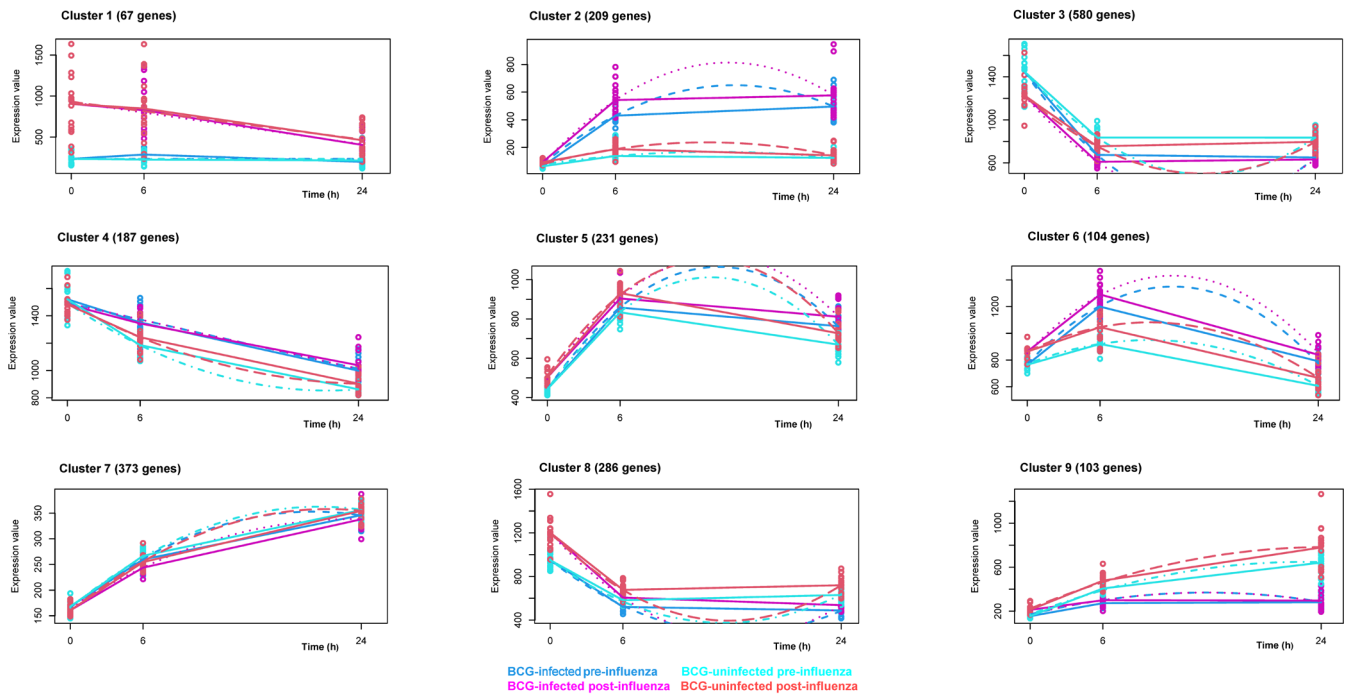

### Extended Data Figure 4. Cytokine responses to BCG *lux* infection, pre- and post-influenza.

Concentrations of IL-10, TNF- $\alpha$ , IL-1 $\beta$ , IL-17-A/F, IL-22 and IL-23 were measured in the supernatants from BCG *lux*-uninfected blood at baseline (0 h incubation) and BCG *lux*-infected blood at 6, 24 and 72 h incubation. Plots showing baseline and maximal concentrations. Box and whiskers plots are shown for 22 influenza PCR+ and 6 PCR- participants, with the horizontal lines showing the medians. Paired comparisons of medians were made using two-tailed Wilcoxon rank sum between the pre- versus post-influenza samples, and baseline versus maximal concentrations, in the PCR+ and PCR- groups. In all plots, false discovery rate (FDR)-corrected p values are shown: ns  $p > 0.05$ , \* $p \leq 0.05$ , \*\* $p \leq 0.01$ , \*\*\* $p \leq 0.001$ , \*\*\*\* $p \leq 0.0001$ .

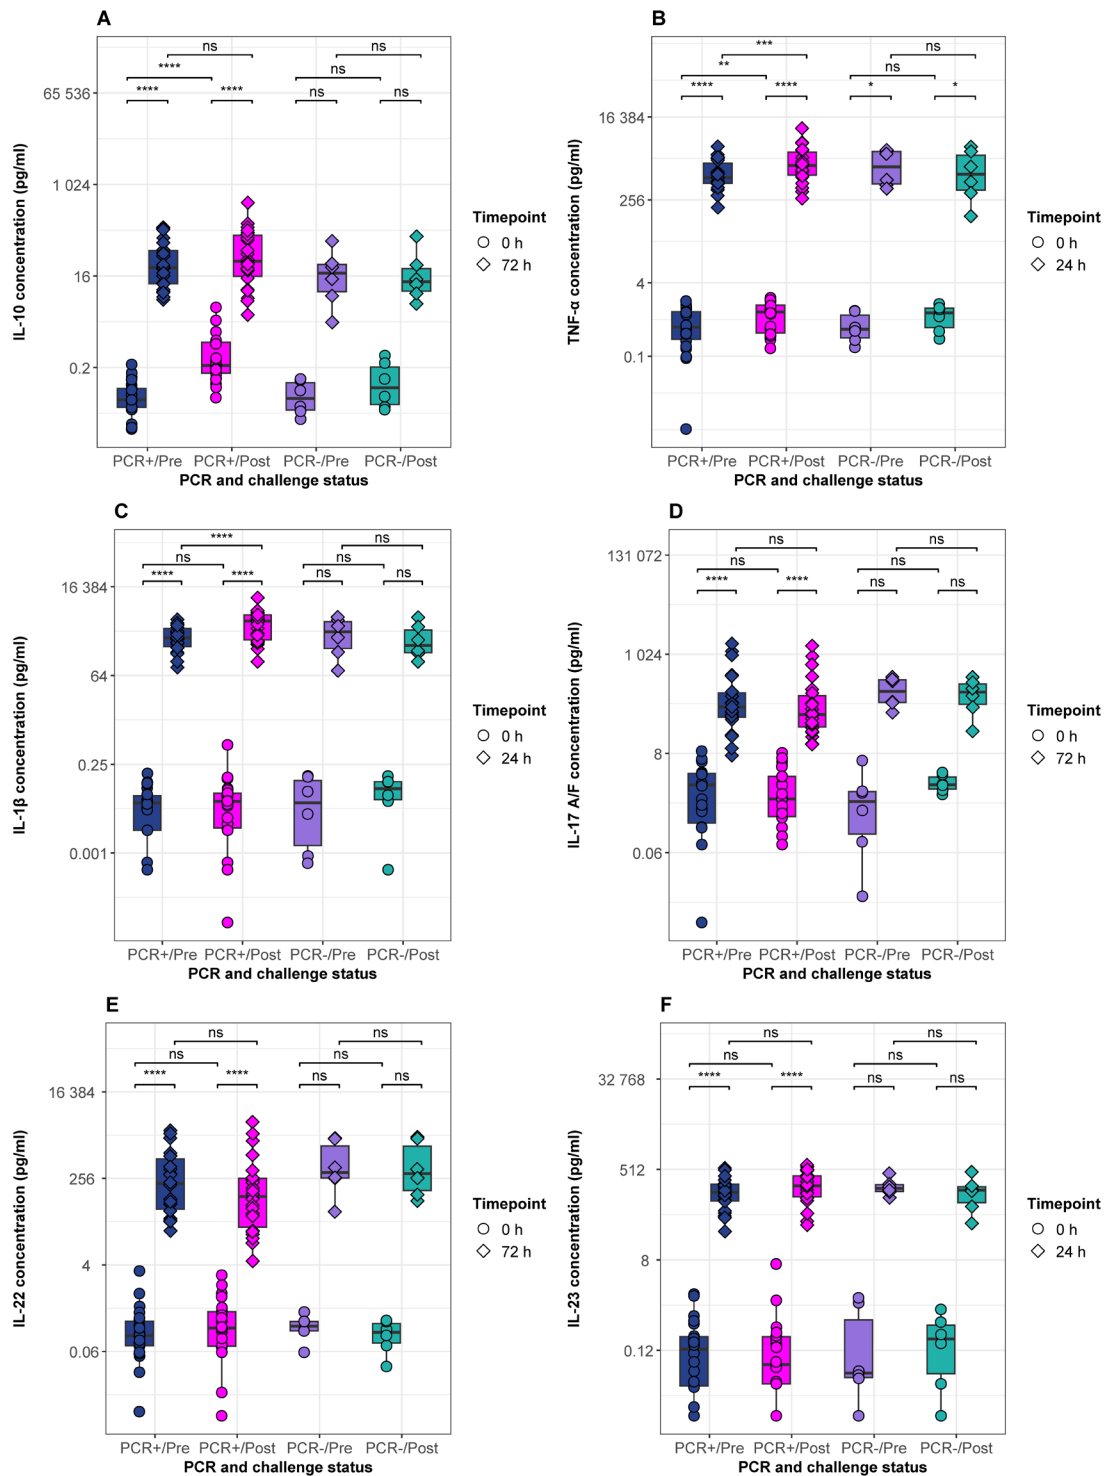

**Extended Data Figure 5. Changing frequencies of cell subsets over time.** Plots showing the frequency of (A) IFN- $\alpha$ + intermediate monocytes, (B) IFN- $\alpha$ + non-classical monocytes, (C) IFN- $\alpha$ + NK cells, (D) TNF- $\alpha$ + classical monocytes, (E) IL-10+ classical monocytes over time. For each cellular subtype, box and whiskers plots of frequency in BCG *lux*-uninfected blood at baseline (0h) and BCG *lux*-uninfected and infected blood at 6 h (C, D) and 24 h (A, B, E) are shown for 16 influenza PCR+ participants, before and after influenza infection, with the horizontal lines showing the medians. Paired comparisons of medians were made using two-tailed Wilcoxon rank sum between pre- versus post-influenza samples, and BCG *lux*-infected versus uninfected samples. In all plots, false discovery rate (FDR)-corrected p values are shown: ns  $p > 0.05$ , \* $p \leq 0.05$ , \*\* $p \leq 0.01$ , \*\*\* $p \leq 0.001$ , \*\*\*\* $p \leq 0.0001$ .

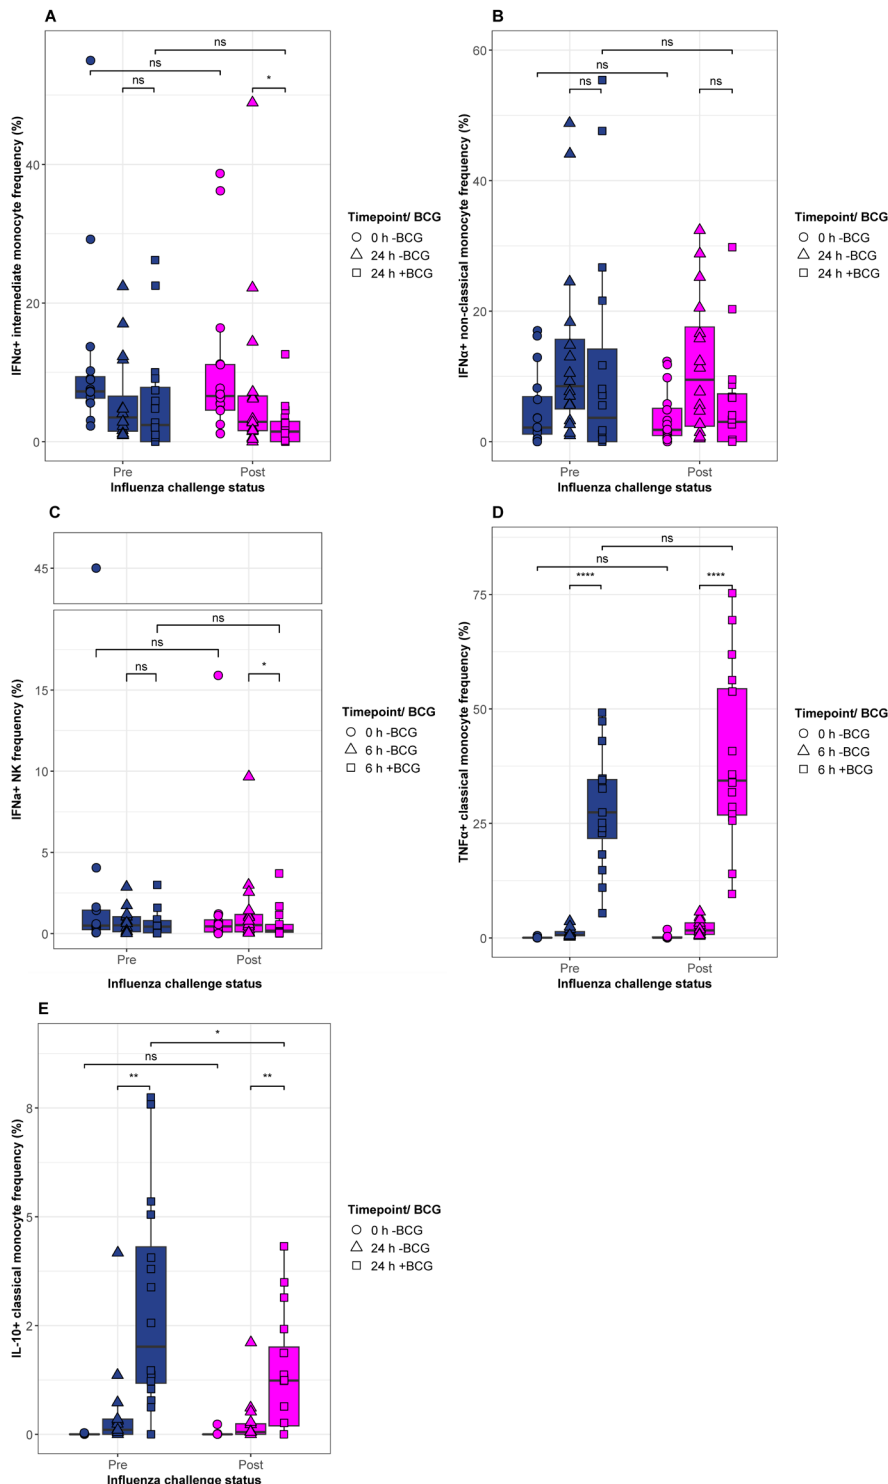

## Extended Data References

1. Jiang H, Tsang L, Wang H, Liu C. IFI44L as a Forward Regulator Enhancing Host Antituberculosis Responses. *Journal of Immunology Research* 2021; **2021**(1): 5599408.
2. Singhania A, Verma R, Graham CM, et al. A modular transcriptional signature identifies phenotypic heterogeneity of human tuberculosis infection. *Nature communications* 2018; **9**(1): 2308.
3. Yu J, Liu SL. Emerging Role of LY6E in Virus-Host Interactions. *Viruses* 2019; **11**(11).
4. Xu X, Qiu C, Zhu L, et al. IFN-stimulated gene LY6E in monocytes regulates the CD14/TLR4 pathway but inadequately restrains the hyperactivation of monocytes during chronic HIV-1 infection. *Journal of immunology (Baltimore, Md : 1950)* 2014; **193**(8): 4125-36.
5. Hornung V, Hartmann R, Ablasser A, Hopfner K-P. OAS proteins and cGAS: unifying concepts in sensing and responding to cytosolic nucleic acids. *Nature Reviews Immunology* 2014; **14**(8): 521-8.
6. Berry MP, Graham CM, McNab FW, et al. An interferon-inducible neutrophil-driven blood transcriptional signature in human tuberculosis. *Nature* 2010; **466**(7309): 973-7.
7. Maertzdorf J, Reipsilber D, Parida SK, et al. Human gene expression profiles of susceptibility and resistance in tuberculosis. *Genes & Immunity* 2011; **12**(1): 15-22.
8. Ottenhoff TH, Dass RH, Yang N, et al. Genome-wide expression profiling identifies type 1 interferon response pathways in active tuberculosis. *PLoS one* 2012; **7**(9): e45839.
9. Leisching G, Wiid I, Baker B. OAS1, 2, and 3: Significance During Active Tuberculosis? *The Journal of infectious diseases* 2018; **217**(10): 1517-21.
10. Leisching G, Cole V, Ali AT, Baker B. OAS1, OAS2 and OAS3 restrict intracellular M. tb replication and enhance cytokine secretion. *International journal of infectious diseases : IJID : official publication of the International Society for Infectious Diseases* 2019; **80s**: S77-s84.
11. Helbig KJ, Beard MR. The Role of Viperin in the Innate Antiviral Response. *Journal of Molecular Biology* 2014; **426**(6): 1210-9.
12. Helbig KJ, Teh MY, Crosse KM, et al. The interferon stimulated gene viperin, restricts *Shigella. flexneri* in vitro. *Scientific Reports* 2019; **9**(1): 15598.
13. Manzanillo PS, Shiloh MU, Portnoy DA, Cox JS. Mycobacterium tuberculosis activates the DNA-dependent cytosolic surveillance pathway within macrophages. *Cell host & microbe* 2012; **11**(5): 469-80.
14. Abella V, Scotece M, Conde J, et al. Leptin in the interplay of inflammation, metabolism and immune system disorders. *Nature Reviews Rheumatology* 2017; **13**(2): 100-9.
15. Naylor C, Petri WA, Jr. Leptin Regulation of Immune Responses. *Trends in molecular medicine* 2016; **22**(2): 88-98.
16. Wieland CW, Florquin S, Chan ED, et al. Pulmonary Mycobacterium tuberculosis infection in leptin-deficient ob/ob mice. *International Immunology* 2005; **17**(11): 1399-408.
17. Chen Y, Cao S, Sun Y, Li C. Gene expression profiling of the TRIM protein family reveals potential biomarkers for indicating tuberculosis status. *Microbial pathogenesis* 2018; **114**: 385-92.
18. van Tol S, Atkins C, Bharaj P, et al. VAMP8 Contributes to the TRIM6-Mediated Type I Interferon Antiviral Response during West Nile Virus Infection. *Journal of virology* 2020; **94**(2).

19. Villamayor L, Rivero V, López-García D, et al. Interferon alpha inducible protein 6 is a negative regulator of innate immune responses by modulating RIG-I activation. *Frontiers in immunology* 2023; **14**: 1105309.
20. Mariotti B, Servaas NH, Rossato M, et al. The Long Non-coding RNA NRIR Drives IFN-Response in Monocytes: Implication for Systemic Sclerosis. *Frontiers in immunology* 2019; **10**: 100.
21. Ren T, Chen H, Liu X, et al. ID1 inhibits foot-and-mouth disease virus replication via targeting of interferon pathways. *The FEBS Journal* 2021; **288**(14): 4364-81.
22. Roy S, Schmeier S, Kaczowski B, et al. Transcriptional landscape of Mycobacterium tuberculosis infection in macrophages. *Scientific Reports* 2018; **8**(1): 6758.
23. Verhelst J, Parthoens E, Schepens B, Fiers W, Saelens X. Interferon-Inducible Protein Mx1 Inhibits Influenza Virus by Interfering with Functional Viral Ribonucleoprotein Complex Assembly. *Journal of virology* 2012; **86**(24): 13445-55.
24. Kim Y-H, Lee J-R, Hahn M-J. Regulation of inflammatory gene expression in macrophages by epithelial-stromal interaction 1 (Epsti1). *Biochemical and Biophysical Research Communications* 2018; **496**(2): 778-83.
25. Wu S, Wang Y, Chen G, Zhang M, Wang M, He JQ. 2'-5'-Oligoadenylate synthetase 1 polymorphisms are associated with tuberculosis: a case-control study. *BMC pulmonary medicine* 2018; **18**(1): 180.
26. Campbell JA, Lenschow DJ. Emerging roles for immunomodulatory functions of free ISG15. *Journal of interferon & cytokine research : the official journal of the International Society for Interferon and Cytokine Research* 2013; **33**(12): 728-38.
27. Bogunovic D, Byun M, Durfee LA, et al. Mycobacterial disease and impaired IFN- $\gamma$  immunity in humans with inherited ISG15 deficiency. *Science* 2012; **337**(6102): 1684-8.
28. Pohl C, Dikic I. Fighting mycobacteria through ISGylation. *EMBO reports* 2012; **13**(10): 872-3.
29. Xu D, Jiang W, Wu L, et al. PLSCR1 is a cell-autonomous defence factor against SARS-CoV-2 infection. *Nature* 2023; **619**(7971): 819-27.
30. Yang AX, Norbrun C, Sorkhdini P, Zhou Y. Phospholipid scramblase 1: a frontline defense against viral infections. *Frontiers in cellular and infection microbiology* 2025; **Volume 15 - 2025**.
31. Arias CF, Ballesteros-Tato A, García Mal, et al. p21CIP1/WAF1 Controls Proliferation of Activated/Memory T Cells and Affects Homeostasis and Memory T Cell Responses1. *The Journal of Immunology* 2007; **178**(4): 2296-306.
32. Lloberas J, Celada A. p21waf1/CIP1, a CDK inhibitor and a negative feedback system that controls macrophage activation. *European journal of immunology* 2009; **39**(3): 691-4.
33. Scatizzi JC, Mavers M, Hutcheson J, et al. The CDK domain of p21 is a suppressor of IL-1 $\beta$ -mediated inflammation in activated macrophages. *European journal of immunology* 2009; **39**(3): 820-5.
34. Lv X, Zheng T, Lei X, et al. RTP4 restricts influenza A virus infection by targeting the viral NS1 protein. *Virology* 2025; **603**: 110397.
35. He X, Ashbrook AW, Du Y, et al. RTP4 inhibits IFN-I response and enhances experimental cerebral malaria and neuropathology. *Proceedings of the National Academy of Sciences of the United States of America* 2020; **117**(32): 19465-74.
36. Zanoni I, Granucci F. Role of CD14 in host protection against infections and in metabolism regulation. *Frontiers in cellular and infection microbiology* 2013; **3**: 32.

37. Burel JG, Hillman H, Khan N, et al. Profiling the myeloid compartment of PBMC in active tuberculosis reveals substantial changes in CD14+ cells and upregulation of CD16 in pro-inflammatory dendritic cells. *The Journal of Immunology* 2022; **208**(1\_Supplement): 161.02-.02.
38. Oshiumi H, Miyashita M, Okamoto M, et al. DDX60 Is Involved in RIG-I-Dependent and Independent Antiviral Responses, and Its Function Is Attenuated by Virus-Induced EGFR Activation. *Cell reports* 2015; **11**(8): 1193-207.
39. Luo L, Bokil NJ, Wall AA, et al. SCIMP is a transmembrane non-TIR TLR adaptor that promotes proinflammatory cytokine production from macrophages. *Nature communications* 2017; **8**(1): 14133.
40. Liu L, Lucas RM, Nanson JD, et al. The transmembrane adapter SCIMP recruits tyrosine kinase Syk to phosphorylate Toll-like receptors to mediate selective inflammatory outputs. *Journal of Biological Chemistry* 2022; **298**(5): 101857.
41. Yang H, Winkler W, Wu X. Interferon Inducer IFI35 Regulates RIG-I-Mediated Innate Antiviral Response through Mutual Antagonism with Influenza Virus Protein NS1. *Journal of virology* 2021; **95**(11): 10.1128/jvi.00283-21.
42. Xiahou Z, Wang X, Shen J, et al. NMI and IFP35 serve as proinflammatory DAMPs during cellular infection and injury. *Nature communications* 2017; **8**(1): 950.
43. Honda K, Yanai H, Negishi H, et al. IRF-7 is the master regulator of type-I interferon-dependent immune responses. *Nature* 2005; **434**(7034): 772-7.
44. Jefferies CA. Regulating IRFs in IFN Driven Disease. *Frontiers in immunology* 2019; **10**: 325.
45. Zhang Q, Bastard P, Liu Z, et al. Inborn errors of type I IFN immunity in patients with life-threatening COVID-19. *Science* 2020; **370**(6515).
46. Ciancanelli MJ, Huang SX, Luthra P, et al. Infectious disease. Life-threatening influenza and impaired interferon amplification in human IRF7 deficiency. *Science* 2015; **348**(6233): 448-53.
47. Zhang G, Chen X, Chan L, et al. An SNP selection strategy identified IL-22 associating with susceptibility to tuberculosis in Chinese. *Sci Rep* 2011; **1**: 20.
48. Cheng Y, Schorey JS. Mycobacterium tuberculosis-induced IFN- $\beta$  production requires cytosolic DNA and RNA sensing pathways. *The Journal of experimental medicine* 2018; **215**(11): 2919-35.
49. Leisching G, Pietersen RD, van Heerden C, van Helden P, Wiid I, Baker B. RNAseq reveals hypervirulence-specific host responses to M. tuberculosis infection. *Virulence* 2017; **8**(6): 848-58.
50. Zhang Z, Mai Q, Yang L, et al. MicroRNA-31 mediated by interferon regulatory factor 7 signaling facilitates control of Mycobacterium tuberculosis infection. *International journal of medical microbiology : IJMM* 2022; **312**(7): 151569.
51. Cubillos-Angulo JM, Arriaga MB, Melo MGM, et al. Polymorphisms in interferon pathway genes and risk of Mycobacterium tuberculosis infection in contacts of tuberculosis cases in Brazil. *International journal of infectious diseases : IJID : official publication of the International Society for Infectious Diseases* 2020; **92**: 21-8.
52. Velie BD, Shrestha M, François L, et al. Using an Inbred Horse Breed in a High Density Genome-Wide Scan for Genetic Risk Factors of Insect Bite Hypersensitivity (IBH). *PLoS one* 2016; **11**(4): e0152966.
53. Xie F, Dong H, Zhang H. Regulatory Functions of Protein Tyrosine Phosphatase Receptor Type O in Immune Cells. *Frontiers in immunology* 2021; **12**: 783370.

54. Du X, Meng F, Peng D, et al. Noncanonical Role of FBXO6 in Regulating Antiviral Immunity. *The Journal of Immunology* 2019; **203**(4): 1012-20.
55. Martínez-Ramos S, Rafael-Vidal C, Malvar-Fernández B, et al. Semaphorin3B promotes an anti-inflammatory and pro-resolving phenotype in macrophages from rheumatoid arthritis patients in a MerTK-dependent manner. *Frontiers in immunology* 2024; **Volume 14 - 2023**.
56. McCormack RM, de Armas LR, Shiratsuchi M, et al. Perforin-2 is essential for intracellular defense of parenchymal cells and phagocytes against pathogenic bacteria. *eLife* 2015; **4**: e06508.
57. McCormack RM, Szymanski EP, Hsu AP, et al. MPEG1/perforin-2 mutations in human pulmonary nontuberculous mycobacterial infections. *JCI insight* 2017; **2**(8).
58. Jeong G, Bae H, Jeong D, et al. A Kelch domain-containing KLHDC7B and a long non-coding RNA ST8SIA6-AS1 act oppositely on breast cancer cell proliferation via the interferon signaling pathway. *Scientific Reports* 2018; **8**(1): 12922.
59. Yi E, Oh J, Kang HR, Song MJ, Park SH. BST2 inhibits infection of influenza A virus by promoting apoptosis of infected cells. *Biochem Biophys Res Commun* 2019; **509**(2): 414-20.
60. Poladian N, Orujyan D, Narinyan W, et al. Role of NF- $\kappa$ B during Mycobacterium tuberculosis Infection. *International journal of molecular sciences* 2023; **24**(2).
61. Tiwari R, de la Torre JC, McGavern DB, Nayak D. Beyond Tethering the Viral Particles: Immunomodulatory Functions of Tetherin (BST-2). *DNA and cell biology* 2019; **38**(11): 1170-7.
62. Stafford CA, Gassauer A-M, de Oliveira Mann CC, et al. Phosphorylation of muramyl peptides by NAGK is required for NOD2 activation. *Nature* 2022; **609**(7927): 590-6.
63. von Bernuth H, Picard C, Jin Z, et al. Pyogenic Bacterial Infections in Humans with MyD88 Deficiency. *Science* 2008; **321**(5889): 691-6.
64. O'Garra A, Redford PS, McNab FW, Bloom CI, Wilkinson RJ, Berry MP. The immune response in tuberculosis. *Annual review of immunology* 2013; **31**: 475-527.
65. Jiang Z, Wei F, Zhang Y, et al. IFI16 directly senses viral RNA and enhances RIG-I transcription and activation to restrict influenza virus infection. *Nature Microbiology* 2021; **6**(7): 932-45.
66. Unterholzner L, Keating SE, Baran M, et al. IFI16 is an innate immune sensor for intracellular DNA. *Nature Immunology* 2010; **11**(11): 997-1004.
67. Zschiegler I, Hardeland U, Krones-Herzig A, et al. Coactivator function of RIP140 for NF $\kappa$ B/RelA-dependent cytokine gene expression. *Blood* 2008; **112**(2): 264-76.
68. Cao L, Hui X, Xu T, et al. The RNA-Splicing Ligase RTCB Promotes Influenza A Virus Replication by Suppressing Innate Immunity via Interaction with RNA Helicase DDX1. *Journal of immunology (Baltimore, Md : 1950)* 2023; **211**(6): 1020-31.
69. Mandatori S, Liu Y, Marturia-Navarro J, et al. PRKAG2.2 is essential for FoxA1(+) regulatory T cell differentiation and metabolic rewiring distinct from FoxP3(+) regulatory T cells. *Sci Adv* 2023; **9**(51): eadj8442.
70. Jiao S, Zhang Z, Li C, et al. The kinase MST4 limits inflammatory responses through direct phosphorylation of the adaptor TRAF6. *Nature Immunology* 2015; **16**(3): 246-57.
