# Supplementary material for: Influenza coinfection inhibits control of mycobacterial infection in a human challenge model
Source: Research Square preprint supplement (doi:10.21203/rs.3.rs-6648705/v1), 2025-06-02
Supplement: Supplementary file 2 [file f4f6228b11ced6b77a468e63.pdf]

## Extended Data

**Extended Data Figure 1. Schematic overview of whole blood samples used for transcriptomics analysis.** Each green and purple box represents a whole blood sample for RNA-sequencing, with each participant contributing 10 unique samples to the model.

**Extended Data Figure 2. Genes significantly differentially expressed for the *BCG: Influenza* interaction and their associations with anti-mycobacterial immune responses.** For each gene, the log2 fold change (LFC) and Benjamini-Hochberg (BH) adjusted p value (adj. p) are listed for the variables: *BCG:Influenza* interaction, *BCG*, *Influenza* and *BCG+ BCG:Influenza*. *BCG+ BCG:Influenza* describes the effect of BCG when influenza is also present. Where adj. p $\leq$ 0.05, the box is shaded blue.

**Extended Data Figure 3. Nine gene clusters identified by maSigPro.** In total, 2,140 genes were identified as significantly differentially expressed (SDE) over time and between pre- versus post-influenza (adj. p  $\leq$  0.05,  $R^2 > 0.6$ ). The coefficients obtained were used to group together SDE genes into clusters with similar temporal expression patterns. Summary plots of gene expression over time for the BCG-infected pre-influenza (dark blue), BCG-infected post-influenza (pink), BCG-uninfected pre-influenza (light blue) and BCG-uninfected post-influenza (red) groups are shown. Solid lines connect the median expression to show the trends for each group, and the dashed lines show the regression curves fitted to the data.

**Extended Data Figure 4. Cytokine responses to BCG *lux* infection, pre- and post-influenza.** Concentrations of IL-10, TNF- $\alpha$ , IL-1 $\beta$ , IL 17-A/F, IL-22 and IL-23 were measured in the supernatants from BCG *lux*-uninfected blood at baseline (0 h incubation) and BCG *lux*-infected blood at 6, 24 and 72 h incubation. Plots showing baseline and maximal concentrations. Box and whiskers plots are shown for 22 influenza PCR+ and 6 PCR- participants, with the horizontal lines showing the medians. Paired comparisons of medians were made using two-tailed Wilcoxon rank sum between the pre-versus post-influenza samples, and baseline versus maximal concentrations, in the PCR+ and PCR- groups. In all plots, false discovery rate (FDR)-corrected p values are shown: ns p > 0.05, \*p  $\leq$  0.05, \*\*p  $\leq$  0.01, \*\*\*p  $\leq$  0.001, \*\*\*\*p  $\leq$  0.0001.

**Extended Data Figure 5. Changing frequencies of cell subsets over time.** Plots showing the frequency of (A) IFN- $\alpha$ + intermediate monocytes, (B) IFN- $\alpha$ + non-classical monocytes, (C) IFN- $\alpha$ + NK cells, (D) TNF- $\alpha$ + classical monocytes, (E) IL-10+ classical monocytes over time. For each cellular subtype, box and whiskers plots of frequency in BCG *lux*-uninfected blood at baseline (0h) and BCG *lux*-uninfected and infected blood at 6 h (C, D) and 24 h (A, B, E) are shown for 16 influenza PCR+ participants, before and after influenza infection, with the horizontal lines showing the medians. Paired comparisons of medians were made using two-tailed Wilcoxon rank sum between pre- versus post-influenza samples, and BCG *lux*-infected versus -uninfected samples. In all plots, false discovery rate (FDR)-corrected p values are shown: ns p > 0.05, \*p  $\leq$  0.05, \*\*p  $\leq$  0.01, \*\*\*p  $\leq$  0.001, \*\*\*\*p  $\leq$  0.0001.

### Extended Data References

## Supplementary Tables

**Supplementary Table 1.** Demographics of influenza challenge patients testing PCR-positive (+) and PCR-negative (-) for Influenza A (H3N2) virus.

**Supplementary Table 2.** Comparisons of baseline (pre-influenza) BCG lux GR<sub>72 h</sub> and  $\Delta$ GR<sub>72 h</sub> for demographics, viral load and symptom scores.

**Supplementary Table 3.** Significantly differentially expressed genes identified in DESeq2 for the variable *BCG*.

**Supplementary Table 4.** Significantly differentially expressed genes identified in DESeq2 for the variable *Influenza*.

**Supplementary Table 5.** Significant pathways identified using IPA for *BCG: Influenza*.

**Supplementary Table 6.** Significant pathways identified using IPA for *BCG*.

**Supplementary Table 7.** Significant pathways identified using IPA for *Influenza*.

**Supplementary Table 8.** Significantly differentially expressed genes identified in DESeq2 with the cell-adjusted model for the variable *BCG: Influenza*.

**Supplementary Table 9.** Significantly differentially expressed genes identified in DESeq2 with the cell-adjusted model for the variable *BCG*.

**Supplementary Table 10.** Significantly differentially expressed genes identified in DESeq2 with the cell-adjusted model for the variable *Influenza*.

**Supplementary Table 11.** Significant pathways identified using IPA for *BCG: Influenza* (cell-adjusted model).

**Supplementary Table 12.** Significant pathways identified using IPA for *BCG* (cell-adjusted model).

**Supplementary Table 13.** Significant pathways identified using IPA for *Influenza* (cell-adjusted model).

**Supplementary Table 14.** Significantly differential expressed genes identified by maSigPro.

**Supplementary Tables 15-21:** Significant pathways identified using IPA for the nine gene clusters
